# Supplementary material for: Error Characteristics and Scale Dependence of Current Satellite Precipitation Estimates Products in Hydrological Modeling
Source: MDPI journal article supplement (doi:10.3390/rs13163061), 2021-08-04
Supplement: s1 [file s1]

Archive with 1 entries (1 files):
- remotesensing-1303738-supplementary.pdf
