# Supplementary material for: Error Characteristics and Scale Dependence of Current Satellite Precipitation Estimates Products in Hydrological Modeling
Source: MDPI journal article supplement (doi:10.3390/rs13163061), 2021-08-04
Supplement: s1 [file s1 › remotesensing-1303738-supplementary.pdf]

***Remote sensing***

**Supplementary Materials for**

**Error characteristics and scale dependence of current satellite precipitation estimates  
products in hydrological modeling**

Yuhang Zhang<sup>1</sup>, Aizhong Ye<sup>1</sup>, Phu Nguyen<sup>2</sup>, Bitu Analui<sup>2</sup>, Soroosh Sorooshian<sup>2,3</sup>, Kuolin Hsu<sup>2</sup>

<sup>1</sup>State Key Laboratory of Earth Surface Processes and Resource Ecology, Faculty of Geographical Science, Beijing Normal University, Beijing 100875, China.

<sup>2</sup>Center for Hydrometeorology and Remote Sensing, Department of Civil and Environmental Engineering, University of California, Irvine, Irvine, California, CA 92697 USA.

<sup>3</sup>Department of Earth System Science, University of California, Irvine, Irvine, California, CA 92697, USA

Corresponding author: Aizhong Ye (azye@bnu.edu.cn)

**Contents of this file**

Figures S1 to S3

Figure S1. Model simulation forced by CMA observation and eight different SPEs (a–h) at YJ station.

Figure S2. Model simulation forced by CMA observation and eight different SPEs (a–h) at DF station.

Figure S3. Model simulation forced by CMA observation and eight different SPEs (a–h) at GZ station.

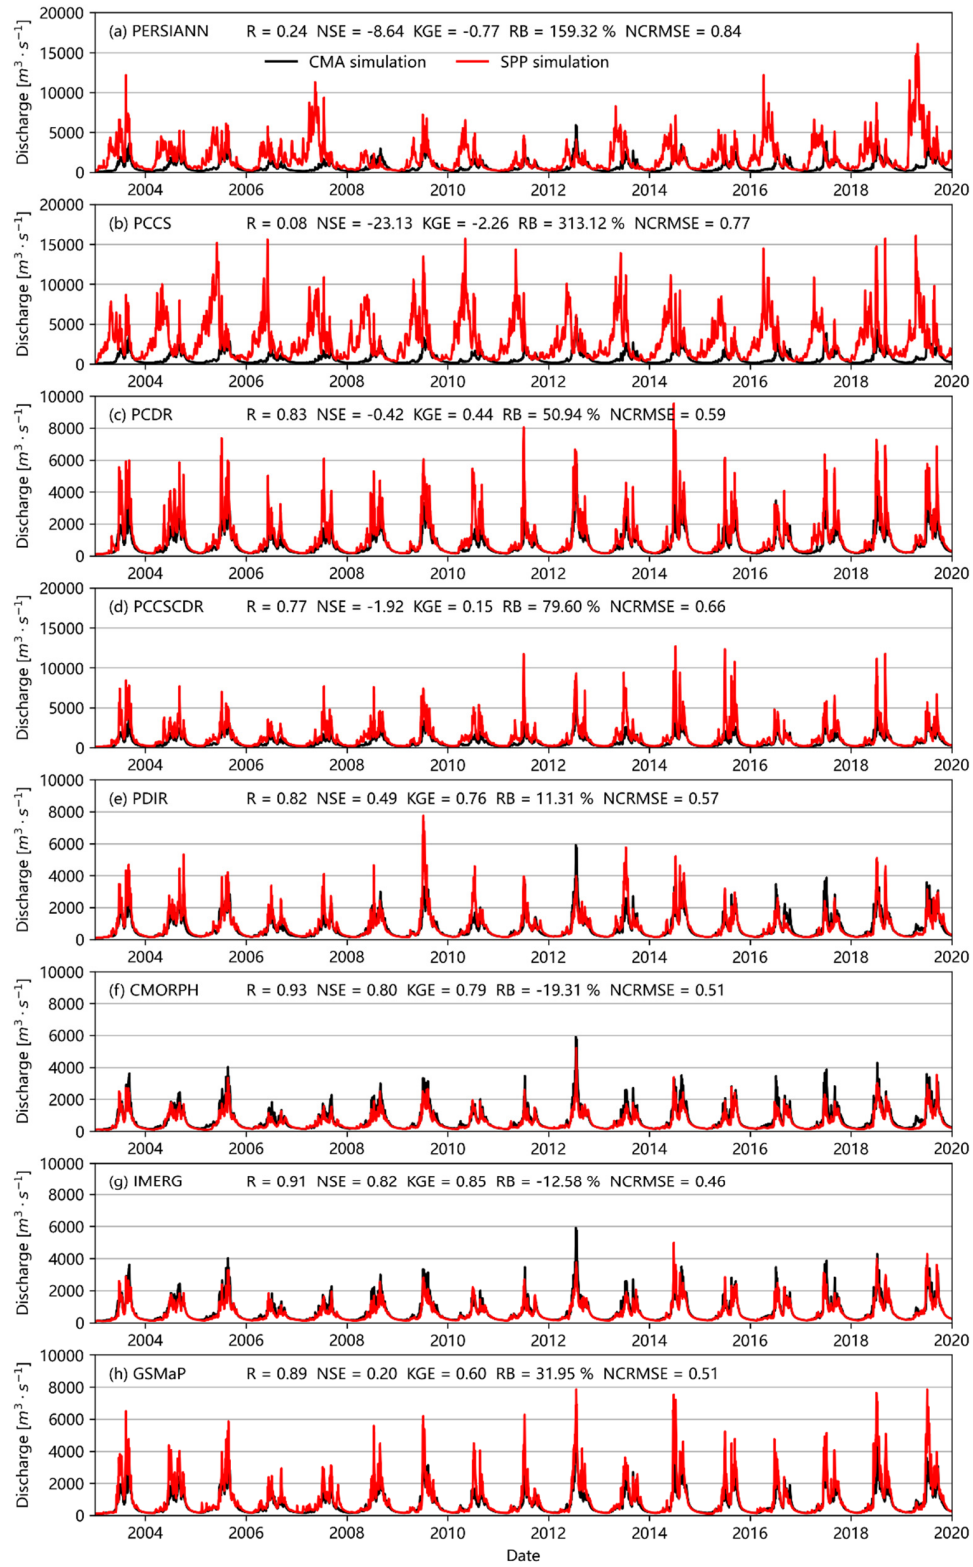

Figure S1. Model simulation forced by CMA observation and eight different SPEs (a-h) at YJ station.

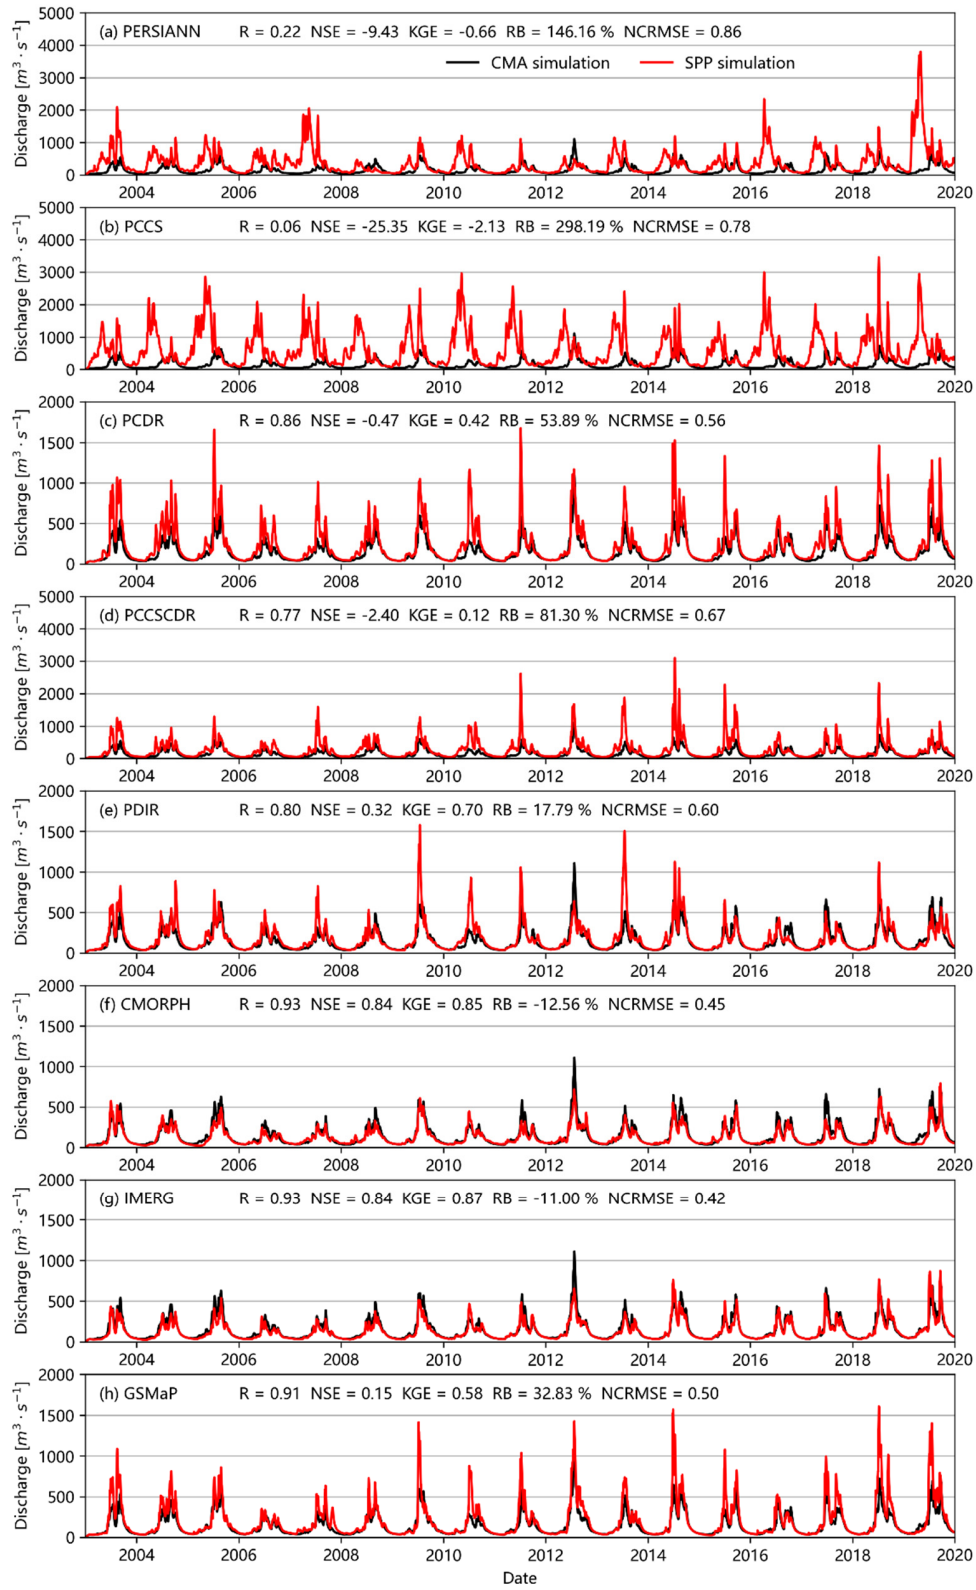

Figure S2. Model simulation forced by CMA observation and eight different SPEs (a-h) at DF station.

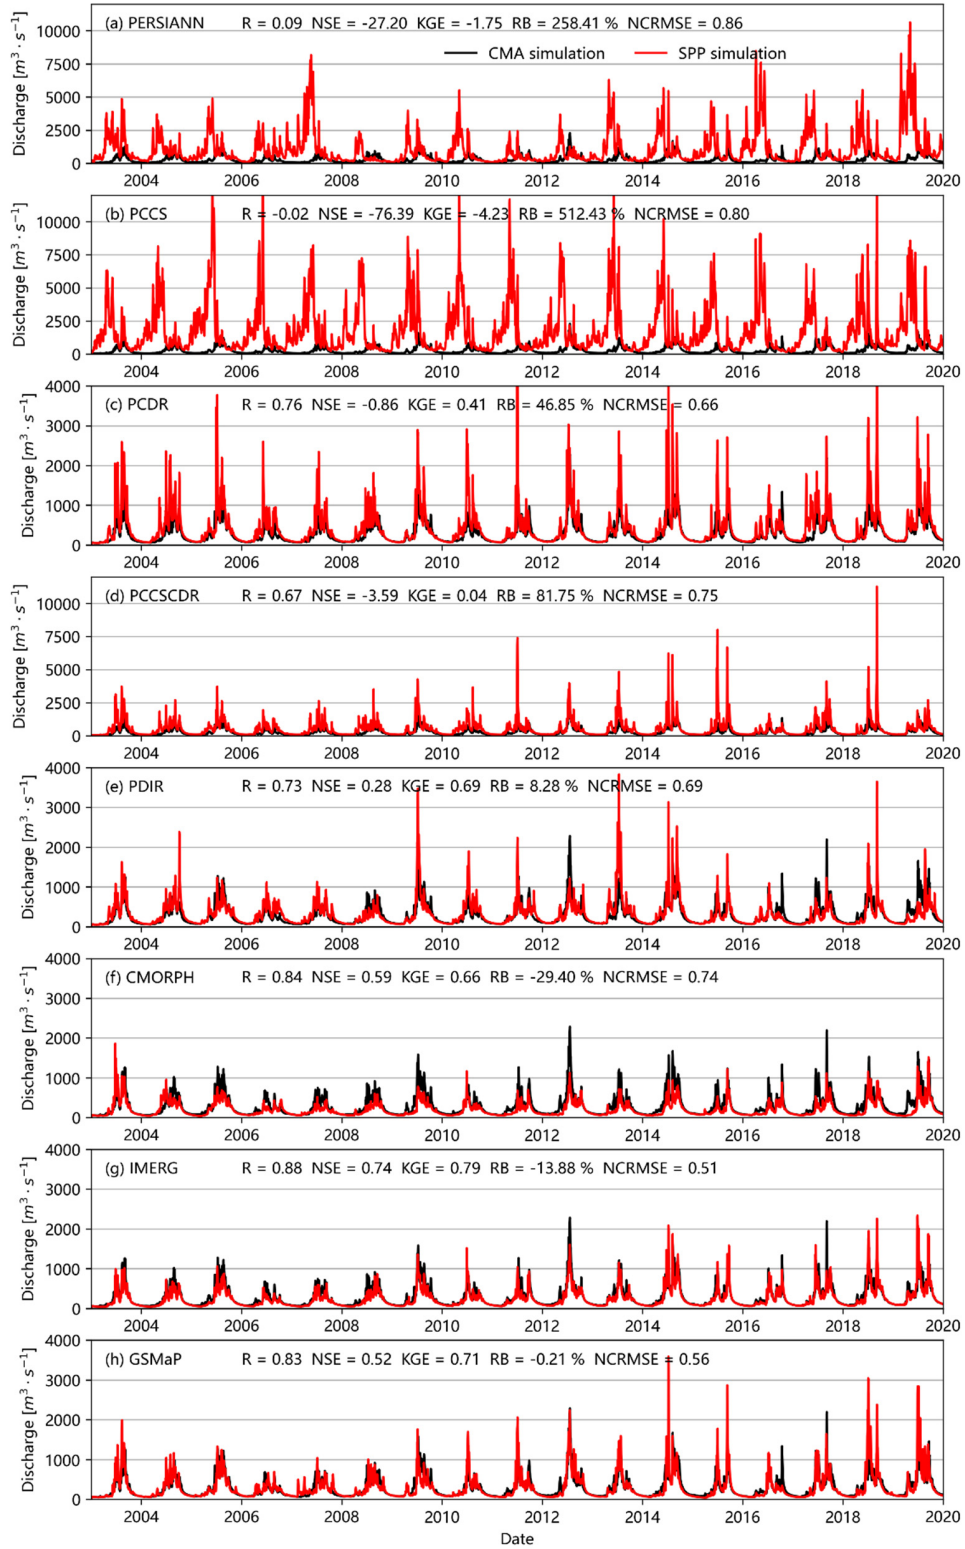

Figure S3. Model simulation forced by CMA observation and eight different SPEs (a–h) at GZ station.
